# Supplementary material for: The mechanism of intramolecular halogen bonding enhanced the quantum efficiency of ultralong organic phosphorescence in the aggregated state
Source: Royal Society of Chemistry journal article supplement (doi:10.1039/d2cp02847f), 2022-01-01
Supplement: d2cp02847f1.pdf [file d2cp02847f1.pdf]

## *Supporting Information*

# Mechanism of Intramolecular Halogen Bonding Enhancing Quantum Efficiency of Ultralong Organic Phosphorescence in Aggregated State

Songsong Liu, Yang Gao, Kai Zhang, Shulei Liu, Hao Lan, Lili Lin, Chuan-Kui Wang, Jianzhong  
Fan\*, Yuzhi Song\*

Shandong Province Key Laboratory of Medical Physics and Image Processing Technology, Institute of  
Materials and Clean Energy, School of Physics and Electronics, Shandong Normal University, 250014  
Jinan, China

Corresponding Author \*

\*Authors to whom correspondence should be addressed.

E-mail: [fanjianzhongvip@163.com](mailto:fanjianzhongvip@163.com) (J. Fan) and [yzsong@sdu.edu.cn](mailto:yzsong@sdu.edu.cn) (Y. Song).

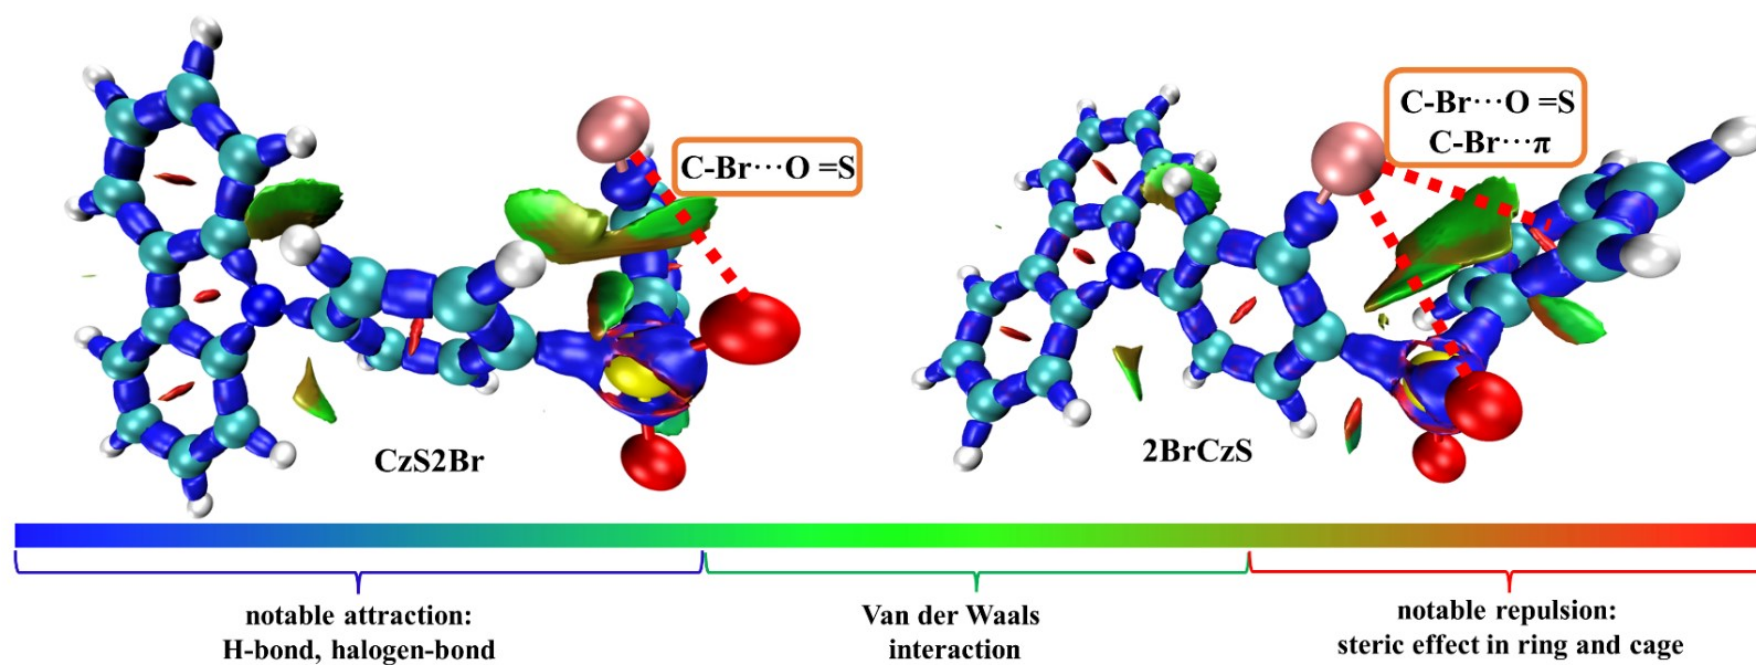

Figure S1 IRI graphical analysis of weak interactions in CzS2Br and 2BrCzS in the aggregated state.

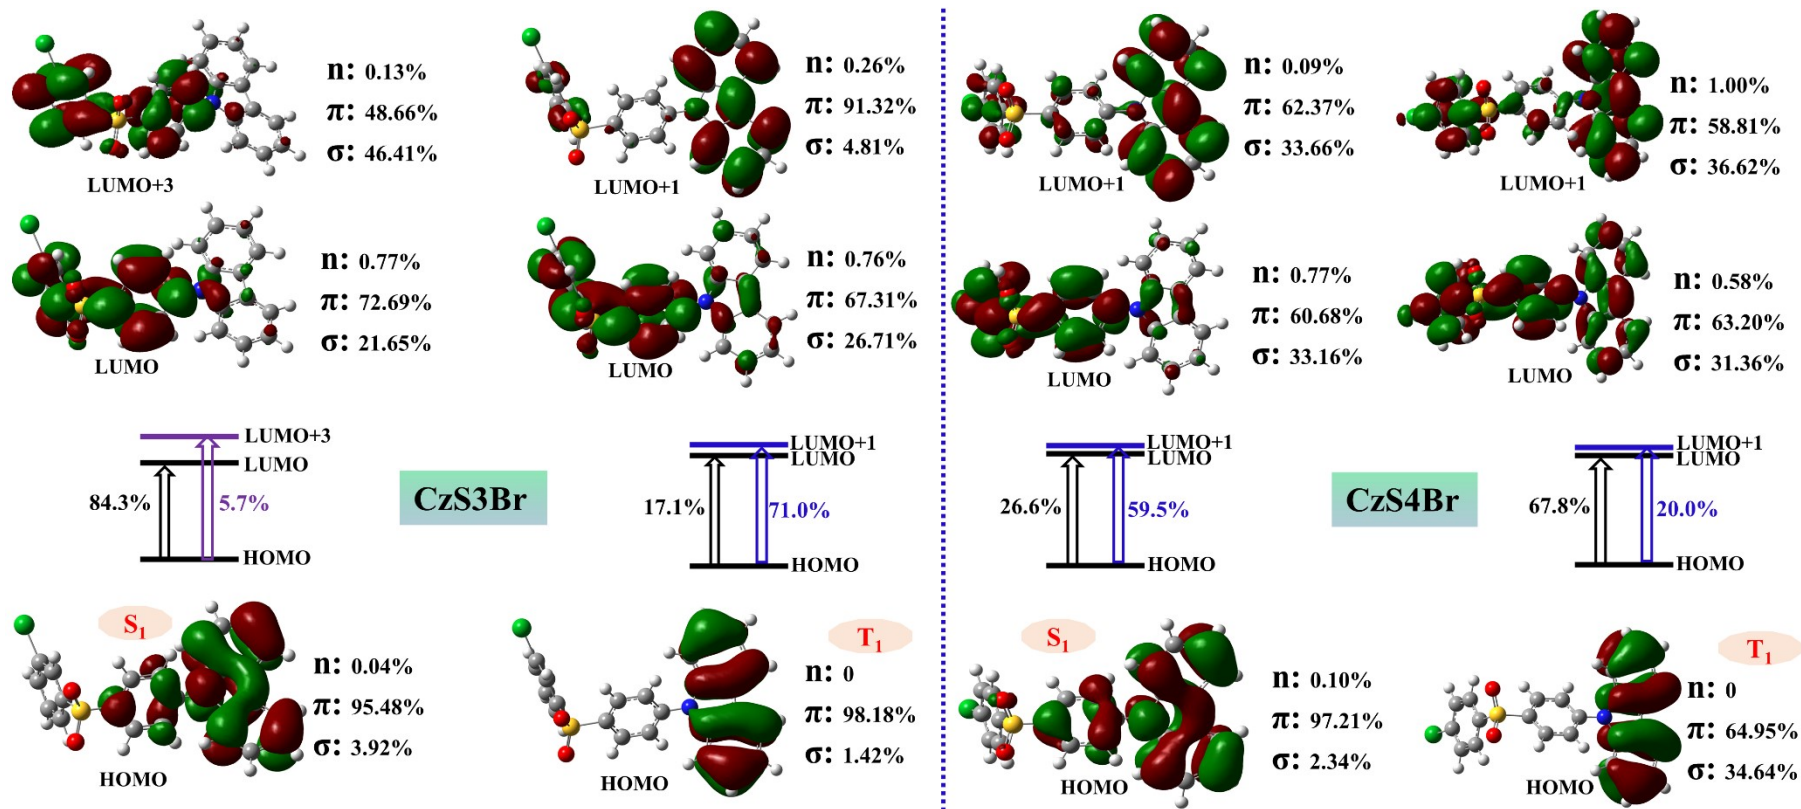

Figure S2 Involved molecular orbitals with energy levels, proportions and charge density distributions for CzS3Br and CzS4Br in the aggregated state.

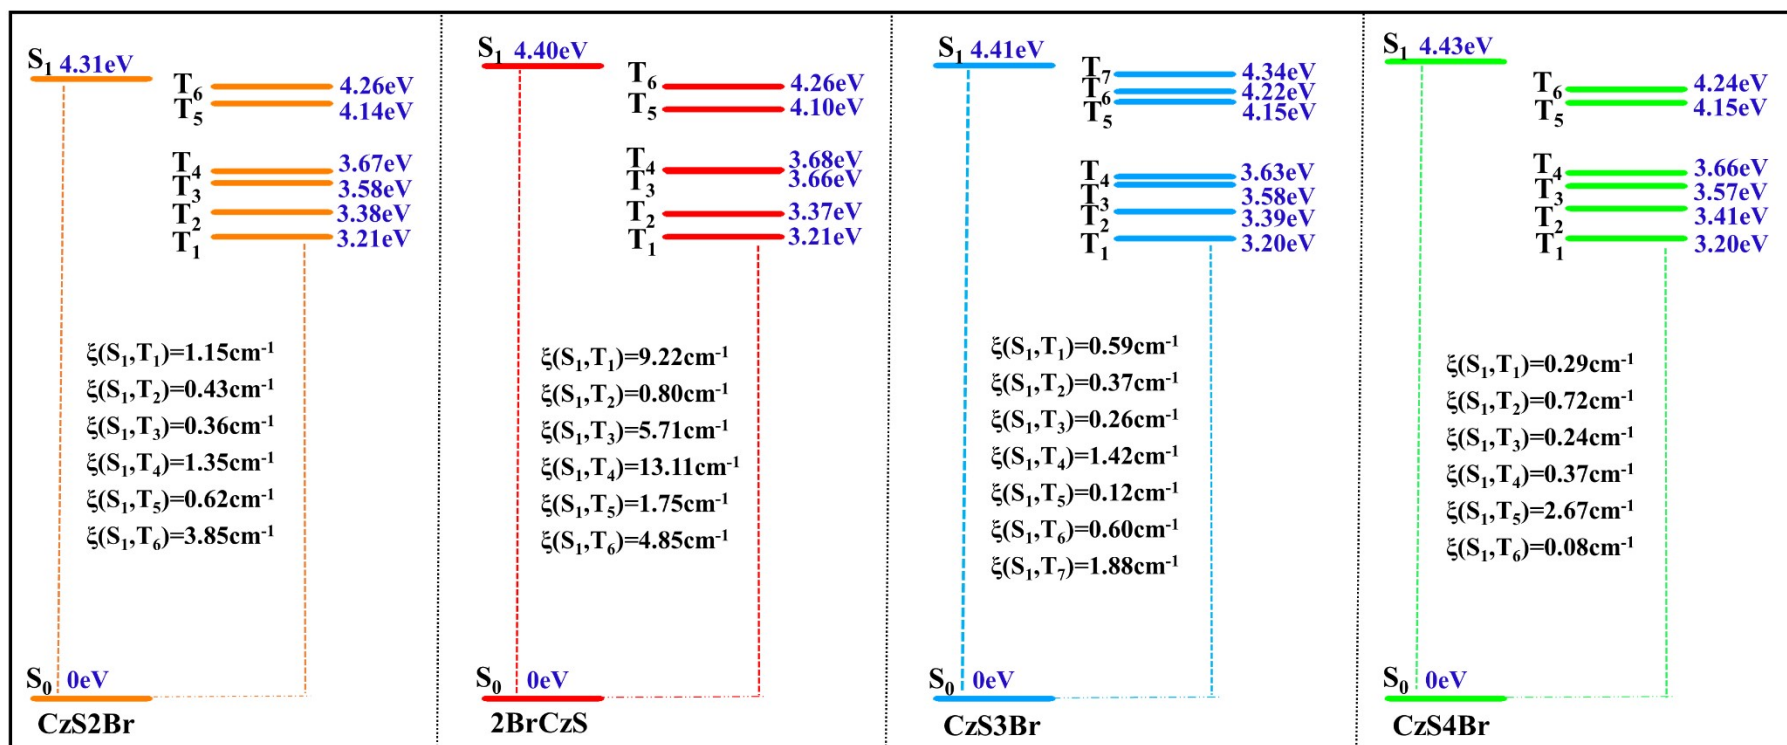

Figure S3 Excitation energy levels and spin-orbit coupling (SOC) matrix elements ( $\xi$ ) between  $S_1$  and  $T_n$  for CzS2Br, 2BrCzS, CzS3Br and CzS4Br in the aggregated state.

■ Bond length   ■ Bond angle   ■ Dihedral angle

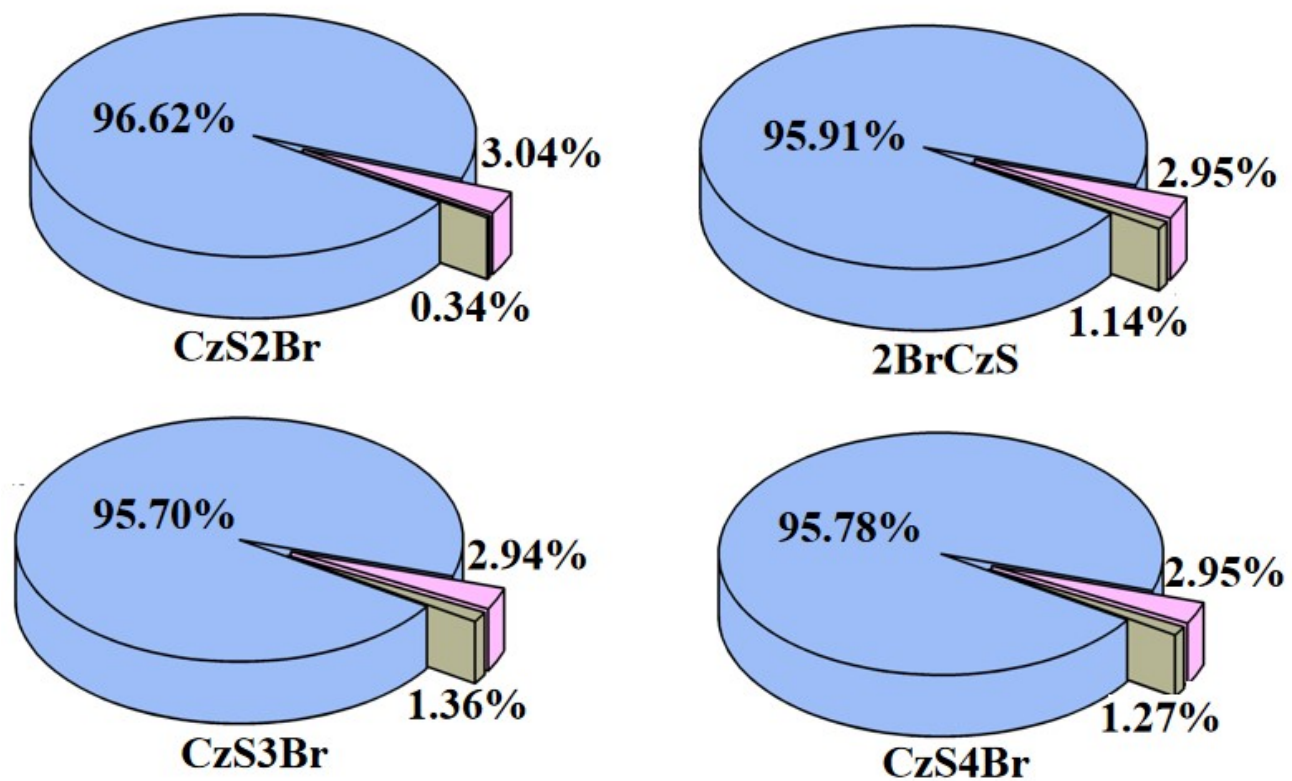

Figure S4 Contribution ratios to the reorganization energies from the bond lengths (red), bond angles (green) and dihedral angles (blue) for CzS2Br, 2BrCzS, CzS3Br and CzS4Br in the aggregated state.



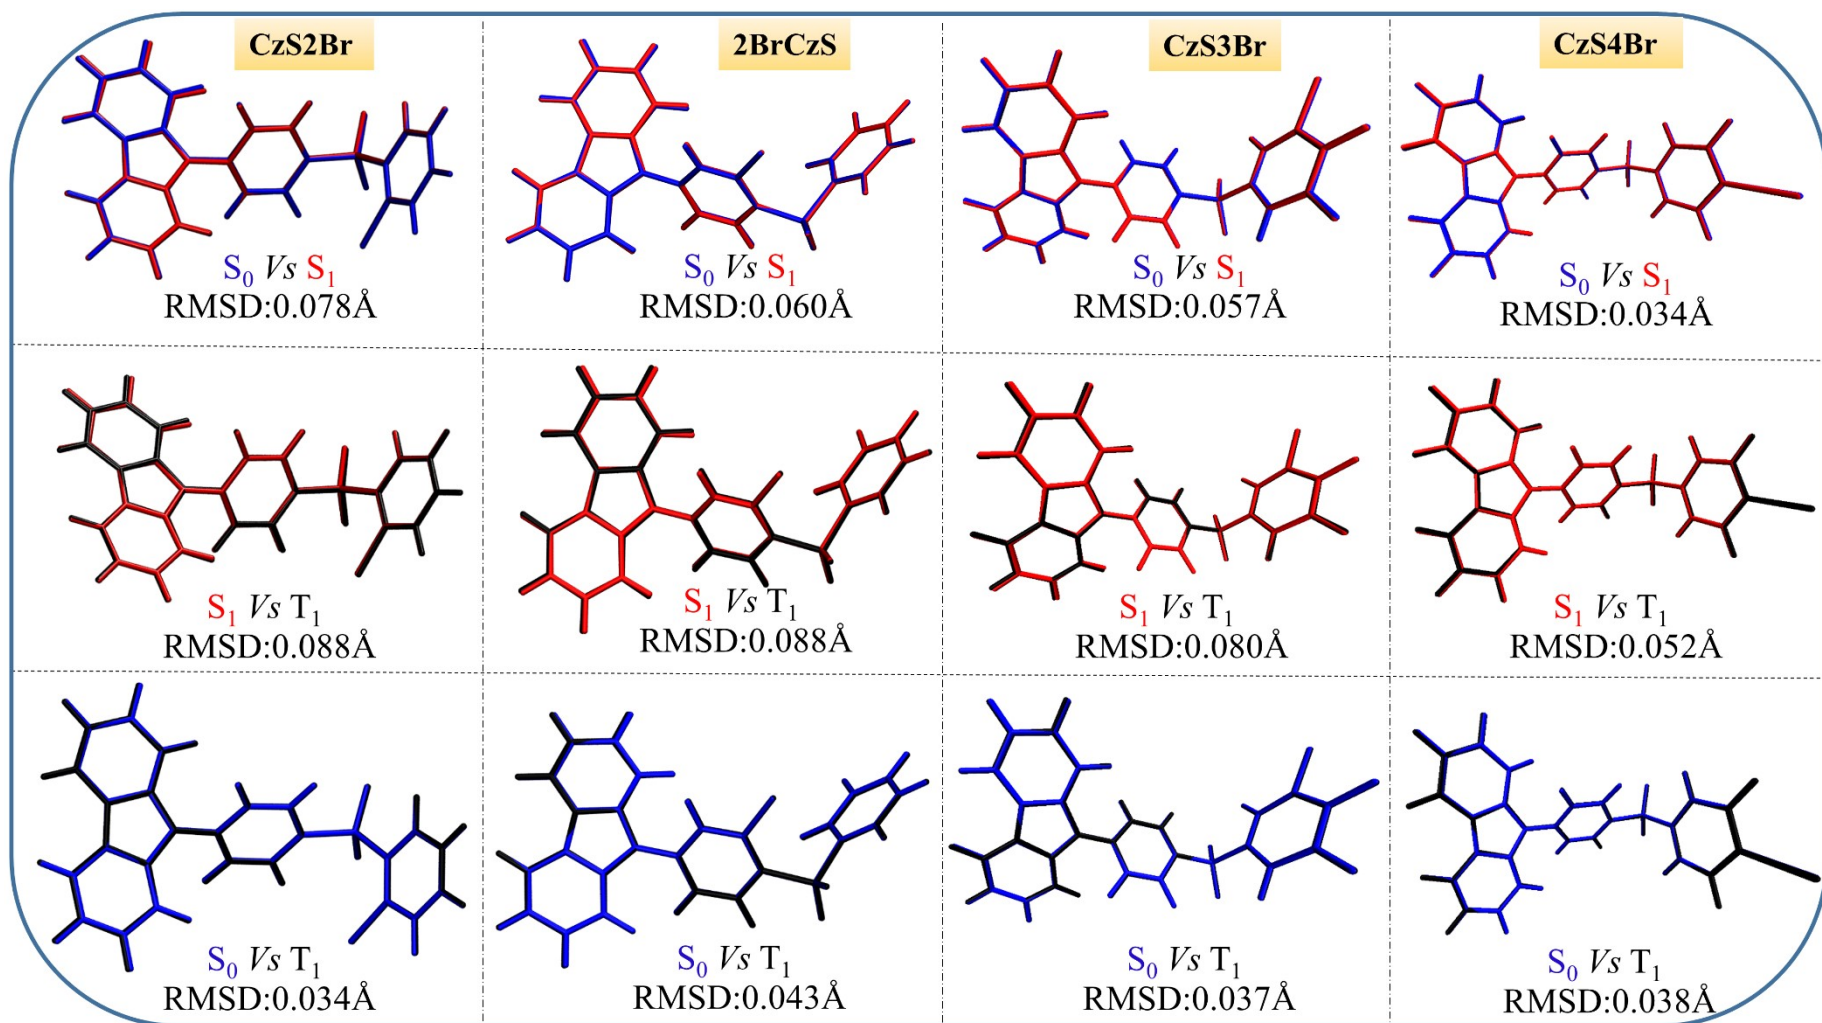

Figure S5 RMSD of  $S_0$  (blue),  $S_1$  (red) and  $T_1$  (black) for CzS2Br, 2BrCzS, CzS3Br and CzS4Br in the aggregated state.

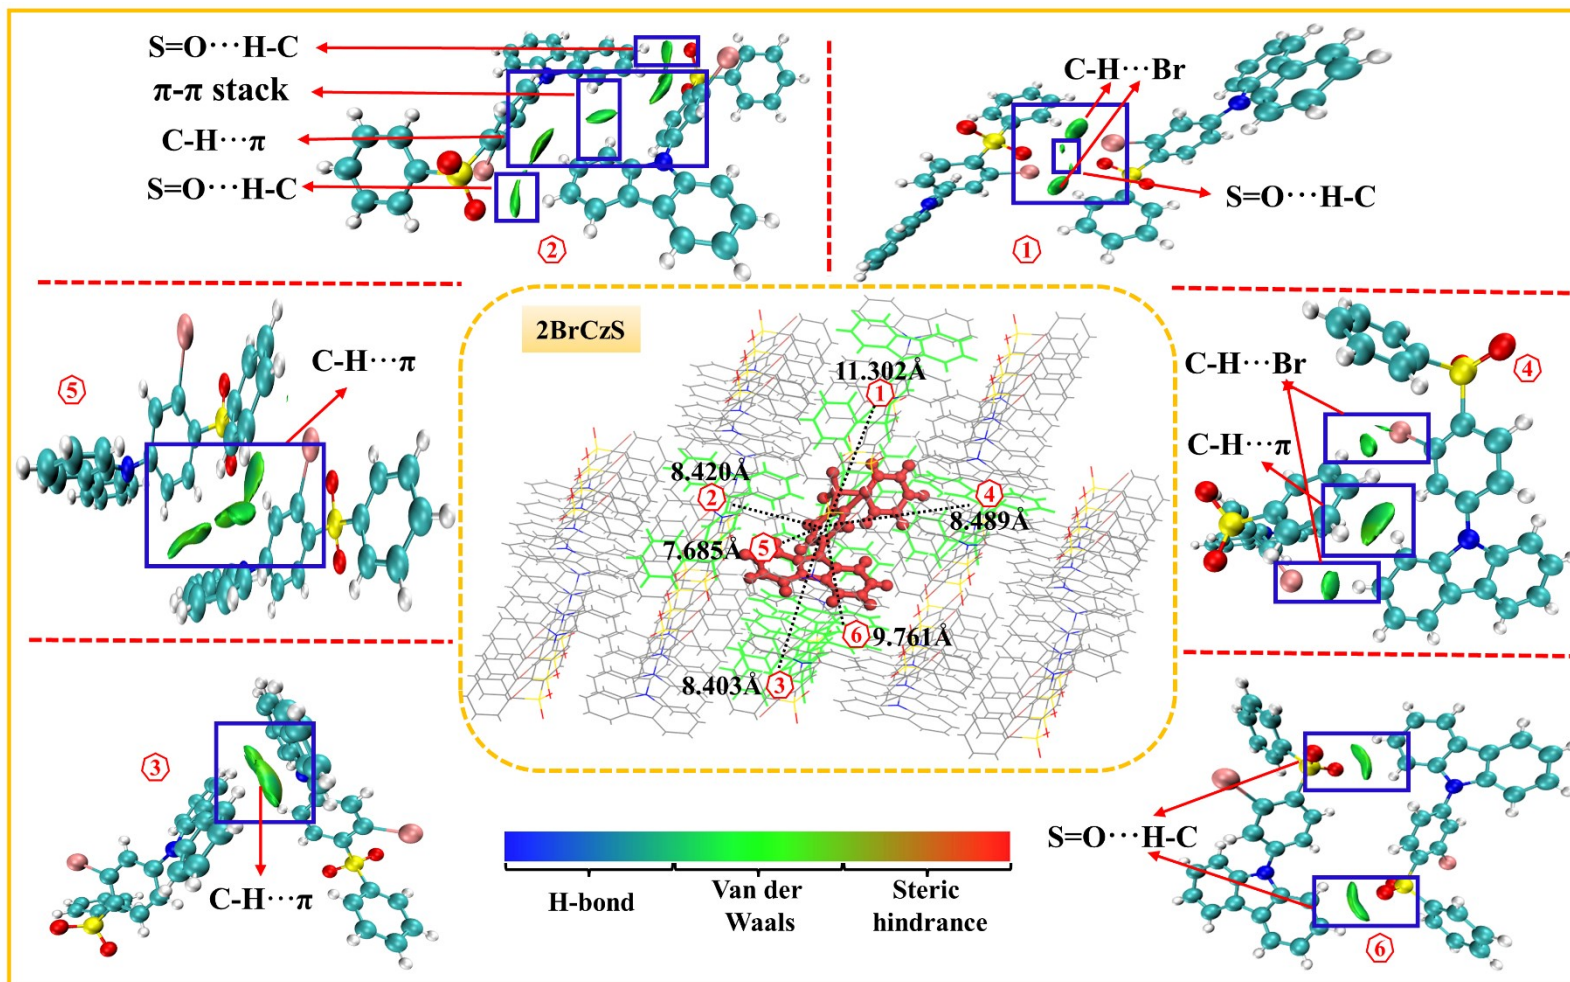

Figure S6 Intermolecular interactions for selected dimers of 2BrCzS described by IGM method in the aggregated state.

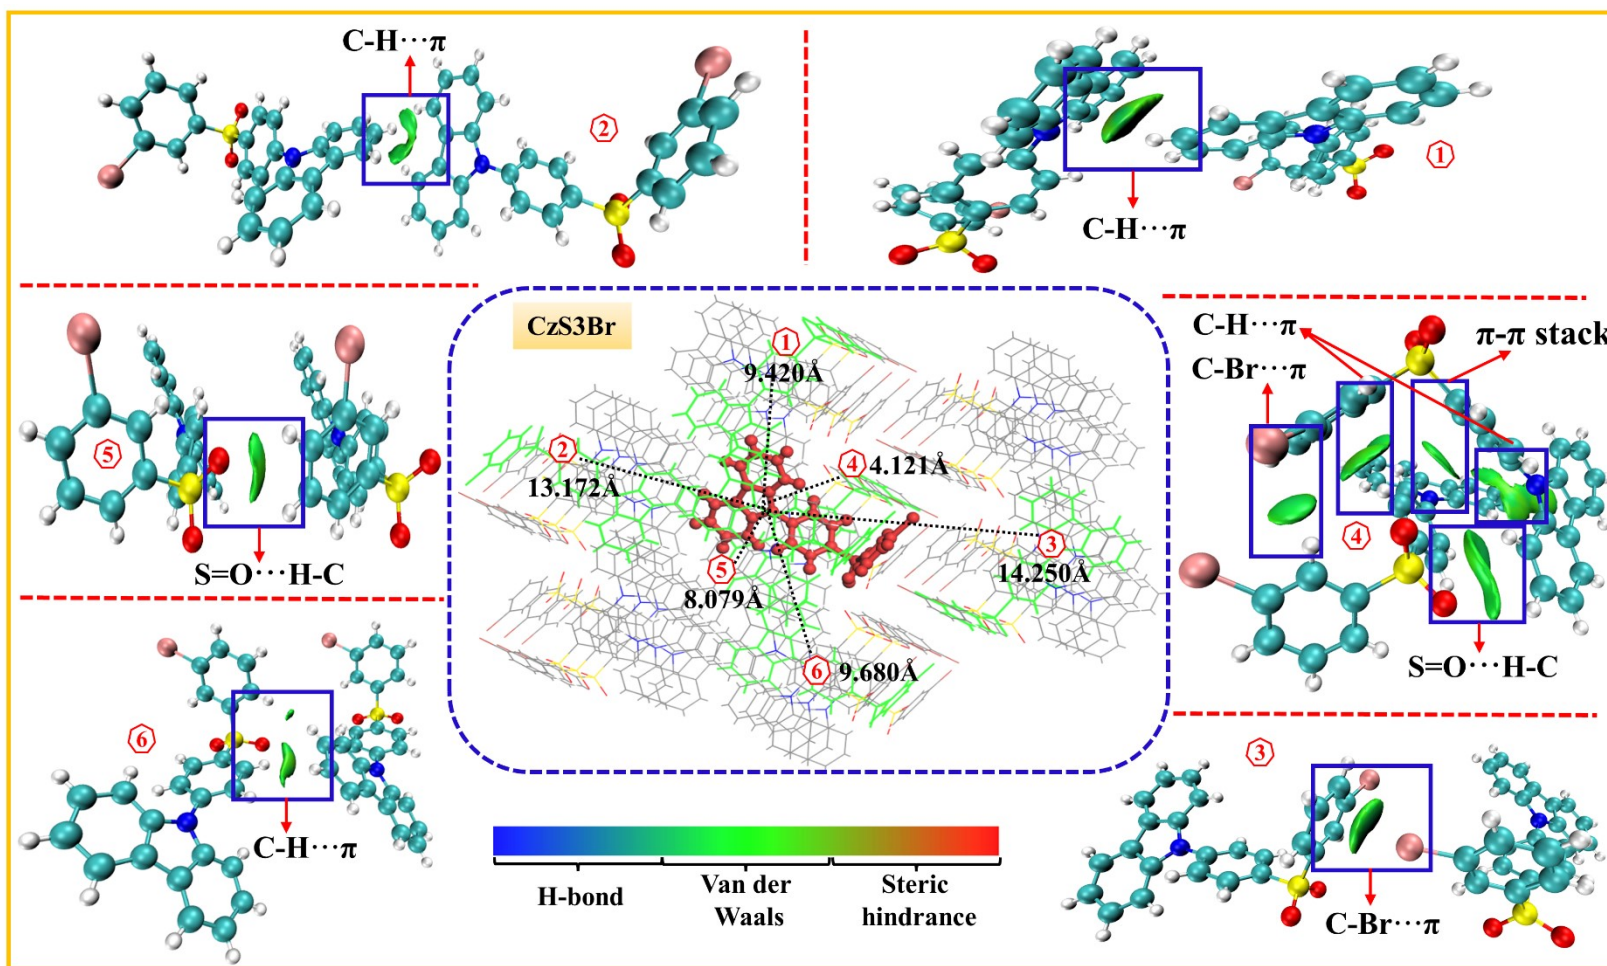

Figure S7 Intermolecular interactions for selected dimers of CzS3Br described by IGM method in the aggregated state.



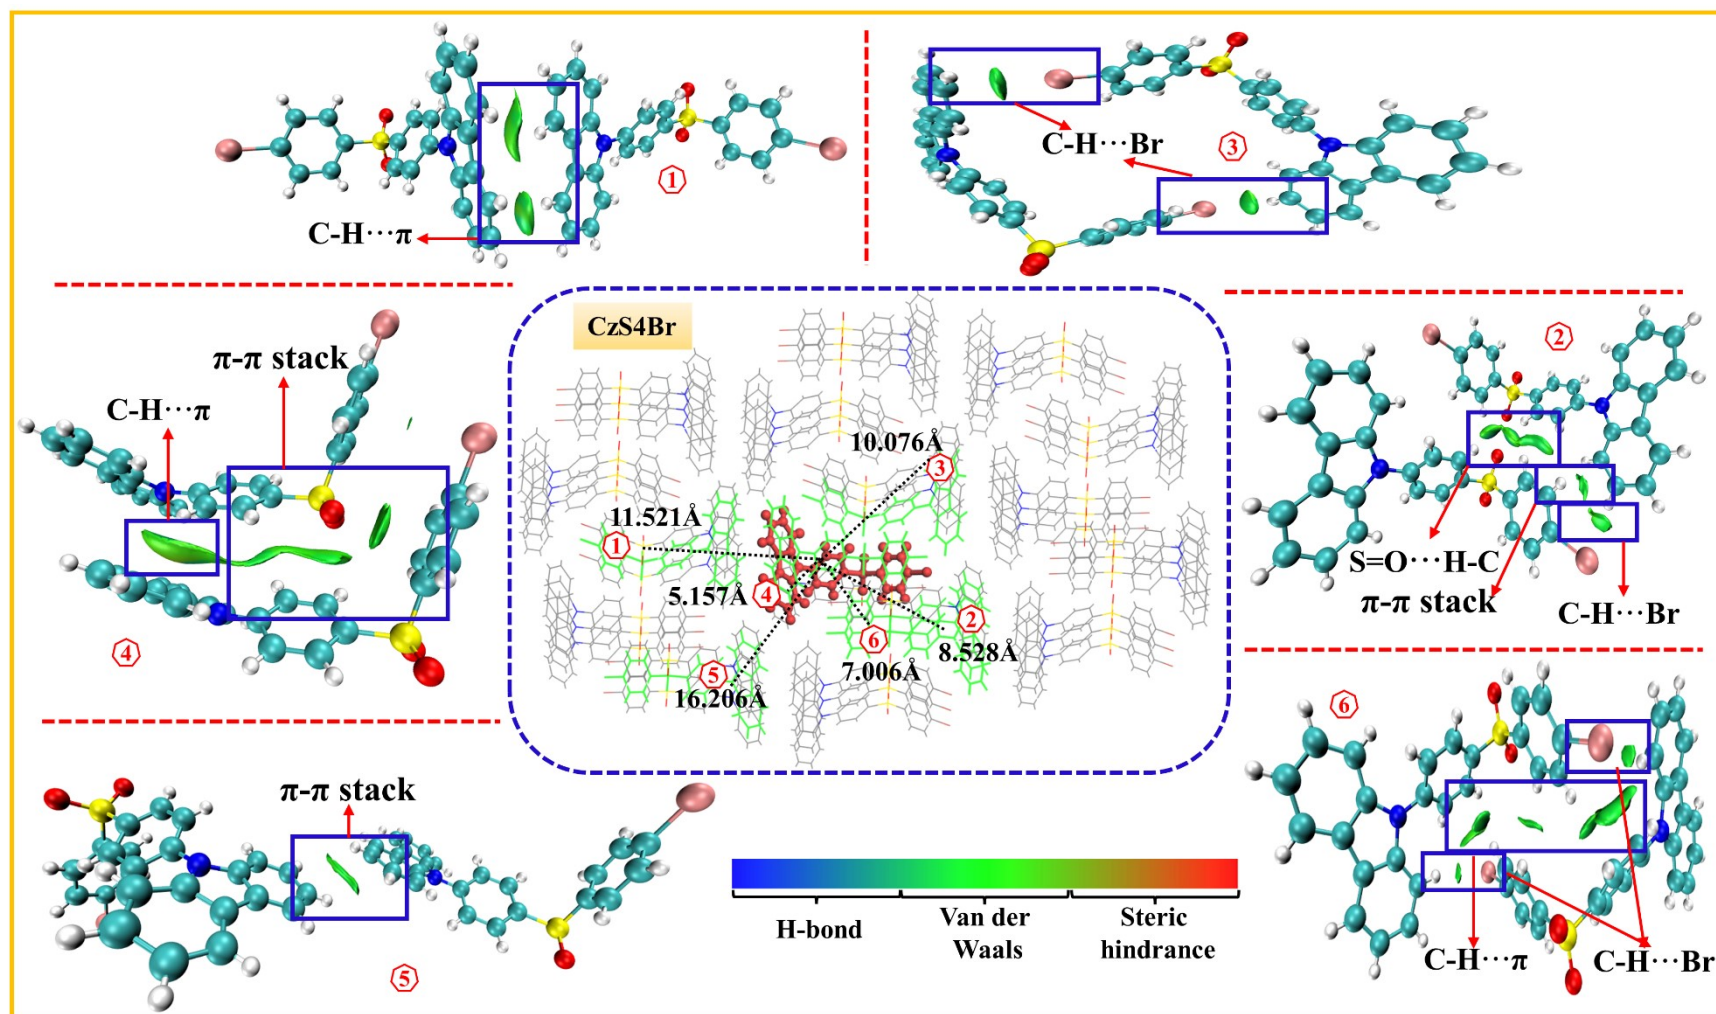

Figure S8 Intermolecular interactions for selected dimers of CzS4Br described by IGM method in the aggregated state.

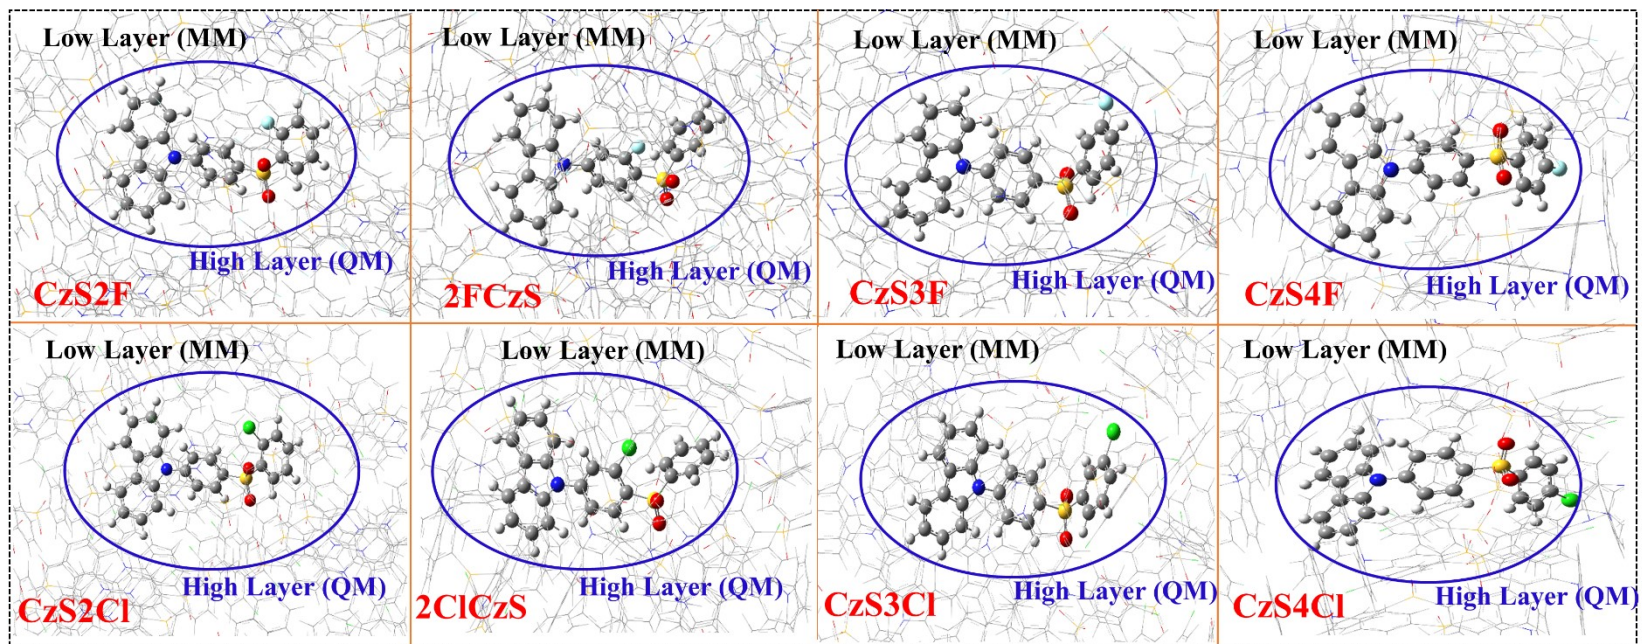

Figure S9 ONIOM model for simulating the aggregated states of CzS2F, 2FCzS, CzS3F, CzS4F, CzS2Cl, 2ClCzS, CzS3Cl and CzS4Cl: the central molecule is treated as a high layer and the surrounding molecules are chosen a low layer.

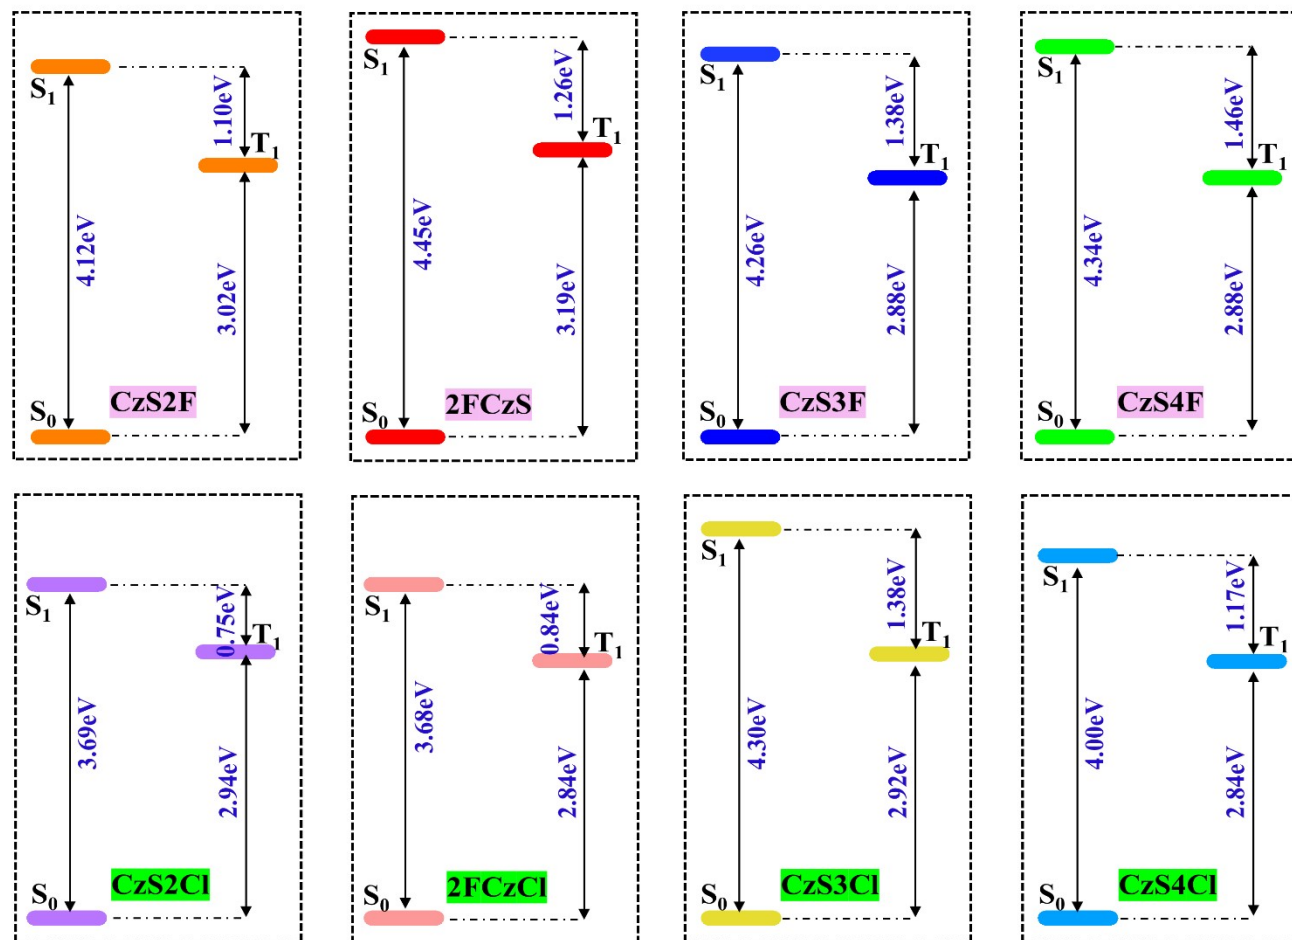

Figure S10 Excitation energy levels and energy difference between different states for CzS2F, 2FCzS, CzS3F, CzS4F, CzS2Cl, 2ClCzS, CzS3Cl and CzS4Cl in the aggregated state.

Table S1 Calculated SOC constants ( $\text{cm}^{-1}$ ) between selected states for CzS2Br, 2BrCzS, CzS3Br and CzS4Br in the gas phase and liquid phase.

|               | Gas                                  |                                      | Liquid                               |                                      |
|---------------|--------------------------------------|--------------------------------------|--------------------------------------|--------------------------------------|
|               | $\langle S_1   H_{so}   T_1 \rangle$ | $\langle T_1   H_{so}   S_0 \rangle$ | $\langle S_1   H_{so}   T_1 \rangle$ | $\langle T_1   H_{so}   S_0 \rangle$ |
| <b>CzS2Br</b> | 0.84                                 | 0.37                                 | 1.53                                 | 0.37                                 |
| <b>2BrCzS</b> | 1.56                                 | 0.38                                 | 9.57                                 | 0.38                                 |
| <b>CzS3Br</b> | 0.26                                 | 0.34                                 | 0.56                                 | 0.34                                 |
| <b>CzS4Br</b> | 0.06                                 | 0.33                                 | 0.58                                 | 0.32                                 |

Table S2 Intermolecular interaction energy (kJ/mol) analysis for selected dimers extracted from the aggregates of 2BrCzS.

| Dimer | Electrostatic | Repulsion | Dispersion | Total  |
|-------|---------------|-----------|------------|--------|
| 1     | -1.56         | 15.90     | -28.33     | -13.99 |
| 2     | -9.59         | 18.47     | -54.67     | -45.79 |
| 3     | -5.30         | 16.50     | -43.06     | -31.86 |
| 4     | -1.94         | 14.29     | -37.21     | -24.85 |
| 5     | -4.96         | 25.00     | -70.02     | -49.98 |
| 6     | -15.39        | 8.82      | -24.29     | -30.86 |



Table S3 Intermolecular interaction energy (kJ/mol) analysis for selected dimers extracted from the aggregates of CzS3Br.

| Dimer | Electrostatic | Repulsion | Dispersion | Total  |
|-------|---------------|-----------|------------|--------|
| 1     | 0.56          | 17.77     | -36.01     | -17.69 |
| 2     | -0.26         | 3.75      | -13.13     | -9.64  |
| 3     | 1.09          | 17.28     | -22.44     | -4.07  |
| 4     | -13.64        | 88.61     | -139.32    | -64.35 |
| 5     | -8.94         | 3.20      | -12.59     | -18.34 |
| 6     | -0.67         | 8.72      | -20.82     | -12.76 |

Table S4 Intermolecular interaction energy (kJ/mol) analysis for selected dimers extracted from the aggregates of CzS4Br.

| Dimer | Electrostatic | Repulsion | Dispersion | Total  |
|-------|---------------|-----------|------------|--------|
| 1     | -2.77         | 9.10      | -27.33     | -21.00 |
| 2     | 2.87          | 18.89     | -46.42     | -24.67 |
| 3     | -1.48         | 15.39     | -25.91     | -12.00 |
| 4     | -16.62        | 41.28     | -113.00    | -88.34 |
| 5     | 0.20          | 1.63      | -6.51      | -4.68  |
| 6     | 0.23          | 19.87     | -54.6      | -34.49 |
